# Supplementary material for: Preparation and Characterization of Protein Molecularly Imprinted Poly (Ionic Liquid)/Calcium Alginate Composite Cryogel Membrane with High Mechanical Strength for the Separation of Bovine Serum Albumin
Source: MDPI journal article supplement (doi:10.3390/molecules27217304), 2022-10-27
Supplement: s1 [file s1]

## Supplementary Information

# **Preparation and Characterization of Protein Molecularly Imprinted Poly (Ionic Liquid)/Calcium Alginate Composite Cryogel Membrane with High Mechanical Strength for the Separation of Bovine Serum Albumin**

**Jie-Ping Fan <sup>1,\*</sup>, Wen-Ya Dong <sup>1</sup>, Xue-Hong Zhang <sup>2</sup>, Jia-Xin Yu <sup>1</sup>, Cong-Bo Huang <sup>1</sup>, Li-Juan Deng <sup>3</sup>, Hui-Ping Chen <sup>1</sup> and Hai-Long Peng <sup>1</sup>**

<sup>1</sup> Department of Chemical Engineering, Nanchang University, Nanchang 330031, China;

<sup>2</sup> School of Foreign Language, Nanchang University, Nanchang 330031, China

<sup>3</sup> School of Chemical Engineering, Ningbo University of Technology, Ningbo 315016, China

\* Correspondence: jasperfan@ncu.edu.cn

**Table S1.** Preparation parameters and  $Q_e$  of MICM for BSA,  $IF$ , tensile strength, and breaking elongation

| Membranes <sup>a</sup> | SA [g] | [VAMIM]Cl [g] | MBA [g] | $Q_e$ [mg g <sup>-1</sup> ] | $IF$  | Tensile Strength [KPa] | Breaking elongation [%] |
|------------------------|--------|---------------|---------|-----------------------------|-------|------------------------|-------------------------|
| MICM0                  | 0      | 1.2010        | 0.1230  | 349.95                      | 2.370 | 2.97                   | 11.31                   |
| MICM1                  | 0.1202 | 1.2010        | 0.1230  | 313.8                       | 0.983 | 12.63                  | 15.40                   |
| MICM2                  | 0.1803 | 1.2010        | 0.1230  | 288.5                       | 1.137 | 18.15                  | 17.88                   |
| MICM3                  | 0.2404 | 1.2010        | 0.1230  | 247.7                       | 1.492 | 29.62                  | 23.81                   |
| MICM4                  | 0.3005 | 1.2010        | 0.1230  | 152.5                       | 1.269 | 54.25                  | 25.01                   |
| MICM5                  | 0.2404 | 1.2010        | 0.0615  | 154.6                       | 1.091 | 26.90                  | 30.83                   |
| MICM6                  | 0.2404 | 1.2010        | 0.1845  | 135.4                       | 0.965 | 33.36                  | 20.44                   |
| MICM7                  | 0.2404 | 0.8013        | 0.0820  | 276.8                       | 1.965 | 114.00                 | 81.90                   |
| MICM8                  | 0.2404 | 0.6010        | 0.0615  | 318.1                       | 2.160 | 90.00                  | 93.70                   |

<sup>a</sup> All MICMs or NMICMs are prepared by adding the same amount of BSA (0.1 g), Tris-HCl buffer solution (10mL), 0.1 g mL<sup>-1</sup> APS (0.5 mL) and 0.05 g mL<sup>-1</sup>TEMED (0.3 mL).

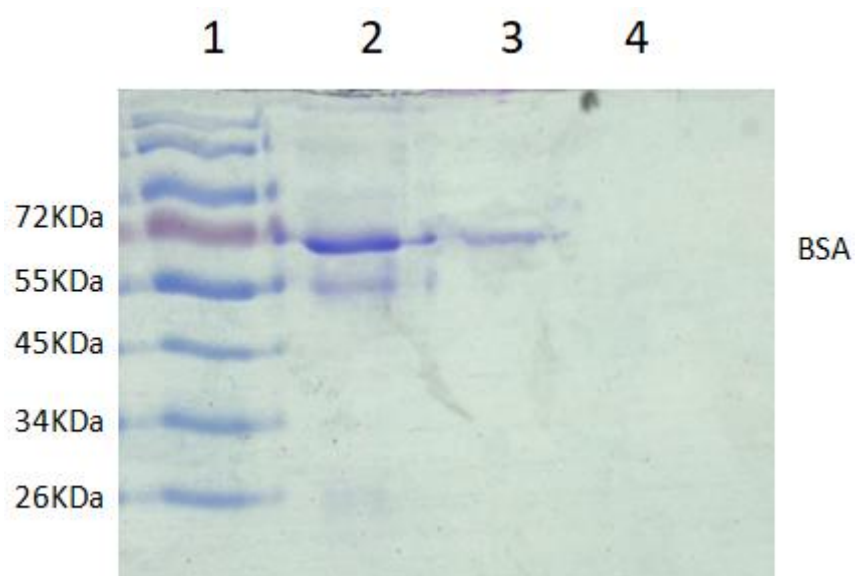

**Figure S1.** The SDS-PAGE analysis of the isolation of BSA from calf serum by membrane adsorption. Lane 1, 10  $\mu$ L of protein molecular weight marker; lane 2, 10  $\mu$ L of 80-fold dilution of calf serum solution before adsorption; lane 3, 10  $\mu$ L of the recovery solution from MICM; lane 4, 10  $\mu$ L of the recovery solution from NMICM.
